# Supplementary material for: The Prediction of Necroptosis-Related lncRNAs in Prognosis and Anticancer Therapy of Colorectal Cancer
Source: Hindawi journal article supplement (doi:10.1155/2022/7158684), 2022-09-23
Supplement: f2 [file 7158684.f2.pdf]

| drug                    | avg(high-risk group) | avg(low-risk group) | p       | fc       | log2fc  |
|-------------------------|----------------------|---------------------|---------|----------|---------|
| Camptothecin_1003       | NA                   | NA                  | 0.23753 | NA       | NA      |
| Vinblastine_1004        | NA                   | 0.083596891         | 0.47178 | NA       | NA      |
| Cisplatin_1005          | 13742842.6           | 346359897.6         | 0.02008 | 25.2029  | 4.65552 |
| Cytarabine_1006         | 111954.3671          | 36442.63069         | 0.71393 | 0.32551  | -1.6192 |
| Docetaxel_1007          | NA                   | 36.82528058         | 0.11013 | NA       | NA      |
| Gefitinib_1010          | 46894.72374          | NA                  | 0.9226  | NA       | NA      |
| Navitoclax_1011         | 864.7569497          | 221.4831301         | 0.84993 | 0.25612  | -1.9651 |
| Vorinostat_1012         | 21899557.57          | 30.77922586         | 0.20763 | 1.41E-06 | -19.441 |
| Nilotinib_1013          | NA                   | NA                  | 0.65287 | NA       | NA      |
| Olaparib_1017           | 163473200.6          | 18569226.07         | 0.53135 | 0.11359  | -3.1381 |
| AZD7762_1022            | 38121607             | 865081.2063         | 0.88241 | 0.02269  | -5.4616 |
| Afatinib_1032           | 139.4259399          | 93.62781446         | 0.51083 | 0.67152  | -0.5745 |
| Staurosporine_1034      | 0.177569285          | 0.419797212         | 0.01021 | 2.36413  | 1.24131 |
| PLX-4720_1036           | NA                   | NA                  | 0.8356  | NA       | NA      |
| Wee1 Inhibitor_1046     | NA                   | NA                  | 0.00969 | NA       | NA      |
| Nutlin-3a (-)_1047      | 763.0000752          | 437.9970392         | 0.00627 | 0.57405  | -0.8008 |
| Mirin_1048              | NA                   | NA                  | 0.31503 | NA       | NA      |
| PD173074_1049           | 3816.063269          | NA                  | 0.51591 | NA       | NA      |
| Alisertib_1051          | 236.5492888          | 12.03422161         | 0.02804 | 0.05087  | -4.2969 |
| MK-2206_1053            | 4655.550394          | 1080.60313          | 0.70173 | 0.23211  | -2.1071 |
| Palbociclib_1054        | 383.4511874          | 111.4871898         | 0.78296 | 0.29075  | -1.7822 |
| Dactolisib_1057         | NA                   | NA                  | 0.50033 | NA       | NA      |
| Pictilisib_1058         | 496.5485619          | 8.290267079         | 0.78249 | 0.0167   | -5.9044 |
| PD0325901_1060          | NA                   | NA                  | 0.31821 | NA       | NA      |
| Obatoclox Mesylate_1068 | 1.62E+19             | 12.35619919         | 0.55349 | 7.62E-19 | -60.186 |
| 5-Fluorouracil_1073     | 1429467649           | 2127.981453         | 0.2116  | 1.49E-06 | -19.358 |
| Dasatinib_1079          | 5.366096987          | 6.327472783         | 0.00011 | 1.17916  | 0.23776 |
| Paclitaxel_1080         | NA                   | 300.40032           | 0.24156 | NA       | NA      |
| Crizotinib_1083         | 40.62656457          | 32.59129587         | 0.00702 | 0.80222  | -0.3179 |
| Rapamycin_1084          | 8107.152122          | 8096.855738         | 0.19583 | 0.99873  | -0.0018 |
| Sorafenib_1085          | NA                   | NA                  | 0.13223 | NA       | NA      |
| Irinotecan_1088         | NA                   | NA                  | 0.38762 | NA       | NA      |
| Oxaliplatin_1089        | 337818297            | 66770699.55         | 0.19688 | 0.19765  | -2.339  |
| BMS-536924_1091         | 8.649862931          | 8.597033153         | 0.31784 | 0.99389  | -0.0088 |
| GSK1904529A_1093        | 3836.983774          | 404.7273786         | 0.03718 | 0.10548  | -3.245  |
| PRIMA-1MET_1131         | 210367971.6          | 327198039.6         | 0.61821 | 1.55536  | 0.63725 |
| Erlotinib_1168          | 2172.264293          | 1991.519418         | 0.91029 | 0.91679  | -0.1253 |
| Niraparib_1177          | 673.065369           | 152.1023224         | 0.085   | 0.22598  | -2.1457 |
| MK-1775_1179            | 90681757.82          | 5195.264908         | 0.49266 | 5.73E-05 | -14.091 |
| Dinaciclib_1180         | NA                   | NA                  | 0.38149 | NA       | NA      |
| Gemcitabine_1190        | NA                   | NA                  | 0.70092 | NA       | NA      |
| Bortezomib_1191         | NA                   | NA                  | 0.36106 | NA       | NA      |
| Tamoxifen_1199          | NA                   | NA                  | 0.00124 | NA       | NA      |
| Fulvestrant_1200        | 21.82218045          | 25.87006116         | 0.0001  | 1.18549  | 0.24549 |
| EPZ004777_1237          | 1.94E+14             | 343.7214719         | 0.45114 | 1.77E-12 | -39.042 |
| YK-4-279_1239           | NA                   | 3972.705113         | 0.59562 | NA       | NA      |
| BMS-345541_1249         | NA                   | NA                  | 0.34709 | NA       | NA      |
| AZ960_1250              | 1948793.892          | 653421.9478         | 0.1433  | 0.3353   | -1.5765 |
| Talazoparib_1259        | 39003.20016          | NA                  | 0.57139 | NA       | NA      |
| XAV939_1268             | 125.0078603          | 98.75604912         | 0.79558 | 0.79     | -0.3401 |
| Trametinib_1372         | 2.202849839          | 1.997576271         | 0.00401 | 0.90681  | -0.1411 |
| Dabrafenib_1373         | NA                   | NA                  | 0.1593  | NA       | NA      |
| Temozolomide_1375       | 652.3975836          | 699.1420401         | 0.0054  | 1.07165  | 0.09983 |
| AZD5438_1401            | NA                   | 3518.183238         | 0.07436 | NA       | NA      |
| IAP_5620_1428           | 1006.458898          | 370.9794567         | 0.79887 | 0.3686   | -1.4399 |
| AZD2014_1441            | NA                   | NA                  | 0.32611 | NA       | NA      |
| AZD1208_1449            | 1870067.841          | 1309597.479         | 0.40002 | 0.70029  | -0.514  |

|                       |             |             |         |          |         |
|-----------------------|-------------|-------------|---------|----------|---------|
| AZD1332_1463          | 5962.301821 | 551.1330853 | 0.55308 | 0.09244  | -3.4354 |
| Ruxolitinib_1507      | 196.7439194 | 255.0192129 | 0.00355 | 1.2962   | 0.37429 |
| Linsitinib_1510       | 68.77880757 | 85.09258729 | 0.13694 | 1.23719  | 0.30707 |
| Epirubicin_1511       | NA          | NA          | 0.39797 | NA       | NA      |
| Cyclophosphamide_1512 | 23162.01773 | 227.8764583 | 0.0255  | 0.00984  | -6.6674 |
| Pevonedistat_1529     | NA          | NA          | 0.96473 | NA       | NA      |
| Sapitinib_1549        | 2130.321265 | 1883.177638 | 0.34784 | 0.88399  | -0.1779 |
| Uprosertib_1553       | 2327.904315 | 46.20293343 | 0.05527 | 0.01985  | -5.6549 |
| LCL161_1557           | 284.9227229 | 246.4671915 | 0.46142 | 0.86503  | -0.2092 |
| Lapatinib_1558        | 1.19E+15    | 6.83E+13    | 0.19416 | 0.05763  | -4.1171 |
| Luminespib_1559       | NA          | NA          | 0.33574 | NA       | NA      |
| Alpelisib_1560        | 147.5038978 | 70.88120269 | 0.05747 | 0.48054  | -1.0573 |
| Taselisib_1561        | 36100.93055 | 16.62382789 | 0.99879 | 0.00046  | -11.085 |
| EPZ5676_1563          | 2.76E+12    | 20599784438 | 0.87523 | 0.00747  | -7.0656 |
| SCH772984_1564        | NA          | NA          | 0.6241  | NA       | NA      |
| IWP-2_1576            | 46.14036583 | 30.17844361 | 0.20049 | 0.65406  | -0.6125 |
| Leflunomide_1578      | 221.4272917 | 231.9705149 | 0.19416 | 1.04761  | 0.06711 |
| Entinostat_1593       | NA          | 28.67083328 | 0.0176  | NA       | NA      |
| LGK974_1598           | 90.38689437 | 117.4237646 | 0.00061 | 1.29912  | 0.37754 |
| VE-822_1613           | 4770752.099 | 1142067.102 | 0.34598 | 0.23939  | -2.0626 |
| WZ4003_1614           | 1724.088178 | 974.621105  | 0.01433 | 0.5653   | -0.8229 |
| CZC24832_1615         | 240.6817035 | 251.8537309 | 0.47183 | 1.04642  | 0.06546 |
| AZD5582_1617          | 962215.7678 | 823231.9202 | 0.13376 | 0.85556  | -0.2251 |
| GSK2606414_1618       | 54.4701258  | 56.66651912 | 0.50267 | 1.04032  | 0.05703 |
| PFI3_1620             | 23370.28644 | 1508.561478 | 0.27624 | 0.06455  | -3.9534 |
| PCI-34051_1621        | 518.5090238 | 232.4778158 | 0.0249  | 0.44836  | -1.1573 |
| Wnt-C59_1622          | 219.8031051 | 93.44422844 | 0.01636 | 0.42513  | -1.234  |
| I-BET-762_1624        | 43.04231883 | 55.81344223 | 0.05527 | 1.29671  | 0.37486 |
| RVX-208_1625          | 148.3506185 | 156.5610961 | 0.01487 | 1.05535  | 0.07771 |
| OTX015_1626           | 44.08884015 | 65.12790744 | 0.45553 | 1.4772   | 0.56286 |
| GSK343_1627           | 1514.130393 | 338.5292576 | 0.2819  | 0.22358  | -2.1611 |
| ML323_1629            | 150.0850124 | 129.9711328 | 0.9262  | 0.86598  | -0.2076 |
| Entospletinib_1630    | 154.4489737 | 62.44755306 | 0.06242 | 0.40432  | -1.3064 |
| PRT062607_1631        | 45.22855751 | 51.08031019 | 0.00287 | 1.12938  | 0.17553 |
| AGI-6780_1634         | 135.8663244 | 280.1738543 | 0.01925 | 2.06213  | 1.04413 |
| Picolinici-acid_1635  | 319.7628108 | 300.3143074 | 0.41307 | 0.93918  | -0.0905 |
| AZD5153_1706          | 18.05279154 | 20.2304796  | 0.94358 | 1.12063  | 0.16431 |
| CDK9_5576_1708        | NA          | NA          | 0.54956 | NA       | NA      |
| CDK9_5038_1709        | NA          | NA          | 0.73545 | NA       | NA      |
| Eg5_9814_1712         | NA          | NA          | 0.45896 | NA       | NA      |
| ERK_2440_1713         | NA          | NA          | 0.5336  | NA       | NA      |
| ERK_6604_1714         | 106.6749181 | NA          | 0.41208 | NA       | NA      |
| IRAK4_4710_1716       | 1127.004388 | 485.627409  | 0.9891  | 0.4309   | -1.2146 |
| JAK1_8709_1718        | 22700.78525 | 759.7274378 | 0.00812 | 0.03347  | -4.9011 |
| AZD5991_1720          | NA          | NA          | 0.65453 | NA       | NA      |
| PAK_5339_1730         | 17.43053222 | 13.85656476 | 0.00131 | 0.79496  | -0.331  |
| TAF1_5496_1732        | 125.5536384 | 95.03764152 | 0.72119 | 0.75695  | -0.4017 |
| ULK1_4989_1733        | 992217.5353 | 55.57313744 | 0.90836 | 5.60E-05 | -14.124 |
| VSP34_8731_1734       | NA          | NA          | 0.07517 | NA       | NA      |
| Selumetinib_1736      | NA          | NA          | 0.40859 | NA       | NA      |
| IGF1R_3801_1738       | 451892541.3 | 1430232512  | 0.21049 | 3.16498  | 1.6622  |
| JAK_8517_1739         | 1200231439  | 154.6185651 | 0.18777 | 1.29E-07 | -22.888 |
| AZD4547_1786          | 697867.9674 | 192762.8948 | 0.65154 | 0.27622  | -1.8561 |
| Ibrutinib_1799        | 40105.15306 | 22995.2979  | 0.1952  | 0.57338  | -0.8024 |
| Zoledronate_1802      | 537.6120563 | 64.17700047 | 0.11958 | 0.11937  | -3.0664 |
| Acetalax_1804         | 4667.030893 | 2731.89713  | 0.0998  | 0.58536  | -0.7726 |
| Oxaliplatin_1806      | 6983.655159 | 2249.494979 | 0.78436 | 0.32211  | -1.6344 |
| Carmustine_1807       | 1417.725718 | 942.1797339 | 0.00075 | 0.66457  | -0.5895 |

|                                 |             |             |          |          |         |
|---------------------------------|-------------|-------------|----------|----------|---------|
| Topotecan_1808                  | NA          | NA          | 0.09047  | NA       | NA      |
| Teniposide_1809                 | 1.88E+20    | 8.03E+15    | 0.2264   | 4.27E-05 | -14.516 |
| Mitoxantrone_1810               | 3.77E+19    | 6.91E+16    | 0.46438  | 0.00183  | -9.0936 |
| Dactinomycin_1811               | 358697114.5 | 1.201194016 | 0.32168  | 3.35E-09 | -28.154 |
| Fludarabine_1813                | NA          | NA          | 0.0005   | NA       | NA      |
| Nelarabine_1814                 | 614.8708801 | 689.9068295 | 0.00476  | 1.12204  | 0.16612 |
| Fulvestrant_1816                | 1275.883209 | 272.6767378 | 0.40651  | 0.21372  | -2.2262 |
| Vincristine_1818                | NA          | 1.58E+16    | 0.01214  | NA       | NA      |
| Docetaxel_1819                  | NA          | NA          | 0.02169  | NA       | NA      |
| Hyllotoxin bromide_1825         | NA          | 3830.638914 | 0.15874  | NA       | NA      |
| Dihydrorotenone_1827            | 3.675732228 | 2.97749173  | 0.00462  | 0.81004  | -0.3039 |
| Gallibiscoquinazole_1830        | 1.02E+11    | 31.70975573 | 0.05933  | 3.10E-10 | -31.587 |
| Elephantin_1835                 | NA          | NA          | 0.77679  | NA       | NA      |
| Sinularin_1838                  | 2357790.318 | 1661110.483 | 0.53494  | 0.70452  | -0.5053 |
| Sabutoclax_1849                 | NA          | NA          | 0.43757  | NA       | NA      |
| LY2109761_1852                  | 259.3201058 | 287.742568  | 0.00276  | 1.1096   | 0.15004 |
| OF-1_1853                       | 96.05613972 | 130.0562261 | 0.08567  | 1.35396  | 0.43719 |
| MN-64_1854                      | 112.4499647 | 125.5694085 | 0.01251  | 1.11667  | 0.1592  |
| (G12C) Inhibitor-12_1855        | 47214732.63 | 173.0202155 | 0.16376  | 3.66E-06 | -18.058 |
| MG-132_1862                     | NA          | NA          | 0.34156  | NA       | NA      |
| BDP-00009066_1866               | NA          | NA          | 0.04837  | NA       | NA      |
| Buparlisib_1873                 | NA          | NA          | 0.9794   | NA       | NA      |
| Ulixertinib_1908                | 1948.807527 | 242.2233386 | 0.00119  | 0.12429  | -3.0082 |
| Venetoclax_1909                 | NA          | NA          | 0.00131  | NA       | NA      |
| ABT737_1910                     | NA          | 16.58286366 | 0.44301  | NA       | NA      |
| Dactinomycin_1911               | NA          | NA          | 0.69029  | NA       | NA      |
| Afuresertib_1912                | 21.44550294 | 28.609079   | 0.09586  | 1.33404  | 0.4158  |
| AGI-5198_1913                   | 211.1194825 | 172.3902413 | 0.11573  | 0.81655  | -0.2924 |
| AZD3759_1915                    | 103.9158501 | 82.28274603 | 0.87954  | 0.79182  | -0.3368 |
| AZD5363_1916                    | 2406.063824 | 44.12501229 | 0.44641  | 0.01834  | -5.7689 |
| AZD6738_1917                    | NA          | NA          | 0.158    | NA       | NA      |
| AZD8186_1918                    | 28297.59279 | 88.64511885 | 0.00416  | 0.00313  | -8.3184 |
| Osimertinib_1919                | 15523.45534 | 1568.965363 | 0.53854  | 0.10107  | -3.3066 |
| Cediranib_1922                  | NA          | 3.37E+11    | 0.27408  | NA       | NA      |
| Ipatasertib_1924                | 411.4741209 | 48.41228319 | 0.58982  | 0.11766  | -3.0874 |
| GDC0810_1925                    | 617.0891446 | 534.5072074 | 0.82998  | 0.86618  | -0.2073 |
| GNE-317_1926                    | 10.29091389 | 3.686383497 | 0.30592  | 0.35822  | -1.4811 |
| GSK2578215A_1927                | 7071.230356 | 865.419253  | 0.62981  | 0.12239  | -3.0305 |
| I-BRD9_1928                     | 119791.5366 | 7954.534326 | 0.62035  | 0.0664   | -3.9126 |
| Topoisomerase Inhibitor IX_1930 | NA          | 10.02674138 | 0.12482  | NA       | NA      |
| MIRA-1_1931                     | 644.7629728 | 645.2201617 | 0.07175  | 1.00071  | 0.00102 |
| NVP-ADW742_1932                 | 56384.4589  | 11552.37428 | 0.87331  | 0.20489  | -2.2871 |
| P22077_1933                     | 2.96E+12    | 2.78E+11    | 0.17334  | 0.09387  | -3.4132 |
| Savolitinib_1936                | 75.65466695 | 32.43681669 | 0.00741  | 0.42875  | -1.2218 |
| UMI-77_1939                     | NA          | NA          | 0.24505  | NA       | NA      |
| WIKI4_1940                      | 252275958.5 | 1684.463427 | 0.47483  | 6.68E-06 | -17.192 |
| Vantrone bromide_1941           | 0.057291254 | 0.020849789 | 8.90E-06 | 0.36393  | -1.4583 |
| MIM1_1996                       | 126.2428762 | 140.7849629 | 0.43382  | 1.11519  | 0.15729 |
| WEHI-539_1997                   | NA          | 69.98919494 | 0.26693  | NA       | NA      |
| BPD-00008900_1998               | 121.2197015 | 157.9722396 | 0.0539   | 1.30319  | 0.38205 |
| Foretinib_2040                  | 3.144993446 | 3.229707181 | 0.83804  | 1.02694  | 0.03835 |
| BIBR-1532_2043                  | 201.083485  | 309.9801702 | 0.00688  | 1.54155  | 0.62438 |
| Pyridostatin_2044               | NA          | NA          | 0.9758   | NA       | NA      |
| AMG-319_2045                    | 323507.9331 | 275.0780946 | 5.25E-07 | 0.00085  | -10.2   |
| MK-8776_2046                    | 30686.42554 | 31526.45347 | 0.29909  | 1.02737  | 0.03896 |
| Ulixertinib_2047                | 19.98201506 | 19.02593843 | 0.53734  | 0.95215  | -0.0707 |
| Vinorelbine_2048                | NA          | 8.850537943 | 0.23167  | NA       | NA      |
| VX-11e_2096                     | 160.7662387 | 84.83791763 | 0.12472  | 0.52771  | -0.9222 |

|                 |             |             |         |         |         |
|-----------------|-------------|-------------|---------|---------|---------|
| Uprosertib_2106 | 33540.16273 | 34.3505449  | 0.04945 | 0.00102 | -9.9313 |
| LJI308_2107     | 1485.821935 | 392.581894  | 0.76899 | 0.26422 | -1.9202 |
| AZ6102_2109     | NA          | NA          | 0.6966  | NA      | NA      |
| GSK591_2110     | 127.1828689 | 176.9451129 | 0.00132 | 1.39127 | 0.4764  |
| VE821_2111      | 4549.420972 | 4660.094471 | 0.32734 | 1.02433 | 0.03468 |
| AT13148_2170    | 285.8398128 | 472.9119759 | 0.0545  | 1.65447 | 0.72636 |
